# Supplementary material for: Room-temperature processed, air-stable and highly efficient graphene/silicon solar cells with an organic interlayer
Source: Royal Society of Chemistry journal article supplement (doi:10.1039/c6ta03759c), 2016-01-01
Supplement: c6ta03759c1.pdf [file c6ta03759c1.pdf]

# Room-temperature processed, air-stable and highly-efficient graphene/silicon solar cells with organic interlayers

Dikai Xu, Xuegong Yu\*, Dace Gao, bXinhui Mu, Mengyao Zhong, Shuai Yuan,  
Jiangsheng Xie, Wenying Ye, Jiabing Huang, Deren Yang

Supporting information

## *Extraction the values of series resistances of solar cells*

The current density and voltage ( $J$ - $V$ ) under dark circumstance follow **Equation S1** when series resistance ( $R_s$ ) is taken into account, <sup>1,2</sup>

$$J = J_0 \left( \exp \left( \frac{q(V - JR_s)}{nkT} \right) - 1 \right) \quad (\text{S1})$$

where  $J_s$  is the reversed saturation current density,  $T$  the absolute temperature (298 K) and  $V - JR_s$  the voltage applied across the Schottky solar cells. When  $V - JR_s > 3kT/q$ , the term of minors 1 can be ignored, then the  $J$ - $V$  relation becomes as follows,

$$J = J_0 \exp \left[ \frac{q(V - JR_s)}{nkT} \right] \quad (\text{S2})$$

**Equation S2** is differentiated and rearranged into **Equation S3**.

$$\frac{dV}{d(\ln J)} = R_s A_{eff} J + \frac{nkT}{q} \quad (\text{S1.3})$$

Where  $A_{eff}$  is the effective area of Schottky solar cell. The value of  $R_s$  is obtained from the slope of  $dV/d\ln J$  vs.  $J$  curves.

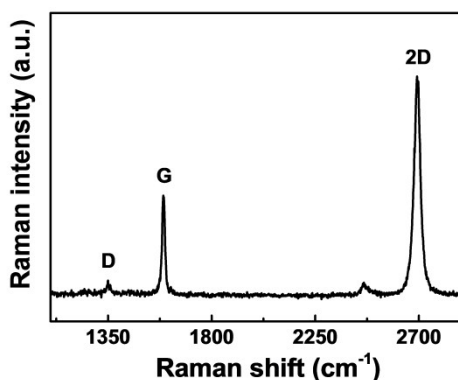

Figure S1. Raman spectrum of a Gr film.

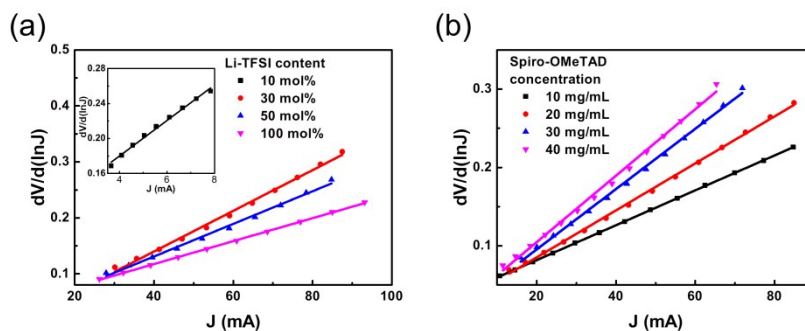

Figure S2. The  $dV/d\ln J$  vs.  $J$  curves of Gr/HTL/Si solar cells varying with (a) Li-TFSI contents and (b) concentration of spiro-OMeTAD solutions to extract the series resistances.

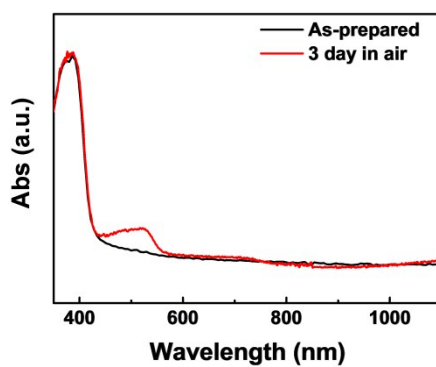

Figure S3. Absorption spectrum of spiro-OMeTAD thin film on glass.

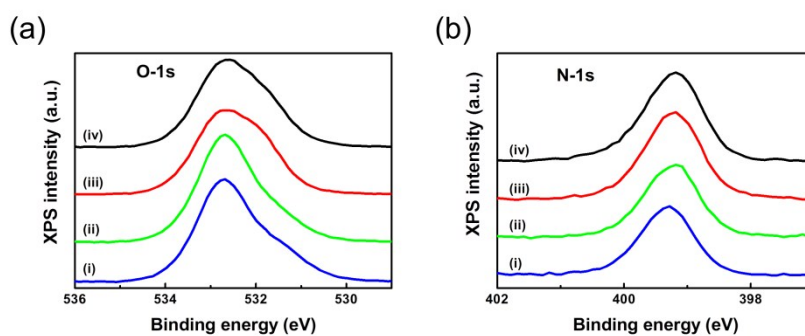

Figure S4. XPS spectra corresponding to (a) O-1s and (b) N-1s core levels of (i) as-prepared spiro-OMeTAD thin films, (ii) Gr protected sample and bare spiro-OMeTAD thin films after (iii) 1 day and 3 days air exposure.

Table S1. Summarized photovoltaic parameters of Gr/Si solar cells with increasing the LiTFSI content of the spiro-OMeTAD solutions.

| LiTFSI content<br>(mol%) | $V_{OC}$<br>(mV) | $J_{SC}$<br>(mA/cm <sup>2</sup> ) | $FF$<br>(%) | PCE<br>(%) | $R_s$<br>( $\Omega$ cm <sup>2</sup> ) |
|--------------------------|------------------|-----------------------------------|-------------|------------|---------------------------------------|
| 0                        | 240.8            | 0.16                              | 33.41       | 0.01       |                                       |
| 10                       | 433.8            | 29.41                             | 31.80       | 4.06       | 20.30                                 |
| 30                       | 444.2            | 30.51                             | 56.28       | 7.63       | 3.63                                  |
| 50                       | 536.4            | 32.50                             | 70.32       | 12.25      | 2.91                                  |
| 100                      | 518.3            | 32.76                             | 68.32       | 11.60      | 2.05                                  |

Table S2. Summarized photovoltaic parameters of Gr/Si solar cells with increasing the concentration of the spiro-OMeTAD solutions.

| Concentration of spiro-OMeTAD<br>(mg/mL) | $V_{OC}$<br>(mV) | $J_{SC}$<br>(mA/cm <sup>2</sup> ) | $FF$<br>(%) | PCE<br>(%) | $R_s$<br>( $\Omega$ cm <sup>2</sup> ) |
|------------------------------------------|------------------|-----------------------------------|-------------|------------|---------------------------------------|
| 10                                       | 530.1            | 31.54                             | 56.42       | 9.43       | 2.22                                  |
| 20                                       | 544.7            | 33.20                             | 71.20       | 12.88      | 3.00                                  |
| 30                                       | 552.2            | 32.84                             | 64.08       | 11.39      | 3.85                                  |
| 40                                       | 558.2            | 31.44                             | 62.15       | 9.91       | 4.24                                  |

## References

- 1 A. Tatarođluand Ş. Altındal, *Microelectron. Eng.*, 2008, **85**, 233-237.
- 2 D. Pysch, A. Metteand S. W. Glunz, *Sol. Energ. Mat. Sol. C.*, 2007, **91**, 1698-1706.
